# Supplementary material for: Proteomic Analysis of Rice Nonhost Resistance to Puccinia striiformis f. sp. tritici Using Two-Dimensional Electrophoresis
Source: MDPI journal article supplement (doi:10.3390/ijms151221644), 2014-11-25

## Supplementary Information

**Figure S1.** Rice leaves inoculated with *Puccinia striiformis* f. sp. *tritici*. Rice leaves at (a) 24 and (b) 48 h post inoculation with *Puccinia striiformis* f. sp. *tritici*. The fungi were stained by Calcofluor White (Sigma–Aldrich, St Louis, MO, USA) and observed according to the methods we published [17].

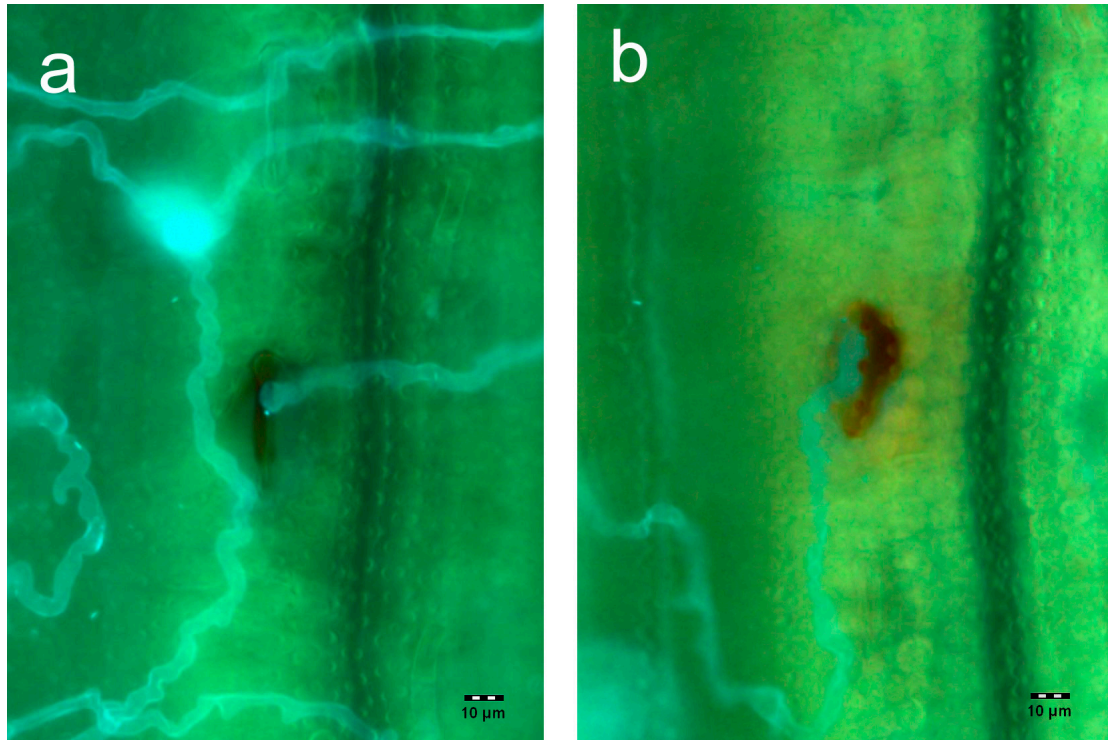

Supplement: s1 [file s1]
