# Supplementary material
Source: MDPI journal article supplement (https://www.mdpi.com/1422-0067/15/12/21644)
Supplement: s1 [file s1]

Archive with 2 entries (2 files):
- Supplementary Figure S1.pdf
- Supplementary Tables S1 and S2- final.xls
