# Supplementary material for: Proteomic Analysis of Rice Nonhost Resistance to Puccinia striiformis f. sp. tritici Using Two-Dimensional Electrophoresis
Source: MDPI journal article supplement (doi:10.3390/ijms151221644), 2014-11-25
Supplement: s1 [file s1 › Supplementary Tables S1 and S2- final.xls]

## Sheet: Table S1
Table S1. Gene Ontology (GO) analysis of differentially expressed proteins.
Level	GO ID	Term	Sequences
2	GO: 0009987	cellular process	gi|46981258, gi|115445387, gi|115448091, gi|115448701, gi|115450493, gi|115458768, gi|115466224, gi|115470052, gi|125552851, gi|224612718, gi|297720471, gi|354618517, gi|297599961, gi|297728925, gi|125588601, gi|15233779, gi|20143564, gi|115446663, gi|115477483, gi|115482032, gi|115488160, gi|125582491
7	GO: 0006412	translation	gi|125588601
2	GO: 0051179	localization	gi|15233779, gi|46981258, gi|20143564, gi|115445387, gi|115448091, gi|115448701, gi|115450493, gi|297599961
2	GO: 0050896	response to stimulus	gi|115445387, gi|115448091, gi|115448701, gi|149392545, gi|15233779, gi|46981258, gi|20143564, gi|115446663, gi|115450493, gi|115466224, gi|125552851, gi|125578088, gi|125582491, gi|297728925, gi|305691143, gi|115470052, gi|115477483
3	GO: 0065008	regulation of biological quality	gi|46981258, gi|297728925
3	GO: 0071704	organic substance metabolic process	gi|125588601, gi|46981258, gi|115448091, gi|115448701, gi|115450493, gi|115458768, gi|115466224, gi|115482032, gi|125552851, gi|224612718, gi|297720471, gi|354618517, gi|15233779, gi|115470052, gi|115488160, gi|115445387, gi|20143564
4	GO: 0006810	transport	gi|15233779, gi|46981258, gi|20143564, gi|115445387, gi|115448091, gi|115448701, gi|115450493, gi|297599961
6	GO: 0061458	reproductive system development	gi|15233779, gi|46981258, gi|115488160
5	GO: 0048731	system development	gi|15233779, gi|46981258, gi|115488160
4	GO: 0006629	lipid metabolic process	gi|46981258, gi|115445387, gi|115448701, gi|115450493
3	GO: 0009056	catabolic process	gi|46981258, gi|115445387, gi|115446663, gi|115448091, gi|115448701, gi|115450493, gi|115470052, gi|125552851, gi|125582491, gi|297728925
4	GO: 0044249	cellular biosynthetic process	gi|125588601
4	GO: 1901576	organic substance biosynthetic process	gi|125588601
3	GO: 0050789	regulation of biological process	gi|115445387, gi|115448091, gi|115448701
3	GO: 0044238	primary metabolic process	gi|125588601, gi|46981258, gi|115448091, gi|115448701, gi|115450493, gi|115458768, gi|115466224, gi|115482032, gi|125552851, gi|224612718, gi|297720471, gi|354618517, gi|15233779, gi|115470052, gi|115488160, gi|115445387, gi|20143564
3	GO: 0044763	single-organism cellular process	gi|115470052, gi|115445387, gi|115448091, gi|115448701, gi|46981258, gi|297728925
6	GO: 0044267	cellular protein metabolic process	gi|125588601, gi|115445387, gi|115448091
3	GO: 0044710	single-organism metabolic process	gi|46981258, gi|115445387, gi|115448701, gi|115450493
4	GO: 0007049	cell cycle	gi|115470052
3	GO: 0048856	anatomical structure development	gi|15233779, gi|46981258, gi|115488160, gi|115448091
4	GO: 0008219	cell death	gi|115445387, gi|115448091, gi|115448701
6	GO: 0034645	cellular macromolecule biosynthetic process	gi|125588601
5	GO: 0044260	cellular macromolecule metabolic process	gi|125588601, gi|115445387, gi|115448091
3	GO: 0009719	response to endogenous stimulus	gi|115445387, gi|115448091, gi|115448701, gi|149392545
3	GO: 0009628	response to abiotic stimulus	gi|15233779, gi|46981258, gi|20143564, gi|115445387, gi|115448091, gi|115448701, gi|115450493, gi|115466224, gi|115470052, gi|115477483, gi|125552851, gi|149392545
2	GO: 0071840	cellular component organization or biogenesis	gi|15233779, gi|46981258, gi|115445387, gi|115448091, gi|115448701, gi|115450493, gi|115488160, gi|125588601, gi|297728925
4	GO: 0046483	heterocycle metabolic process	gi|46981258, gi|20143564, gi|115445387, gi|115448091, gi|115448701, gi|115450493
3	GO: 0009058	biosynthetic process	gi|125588601, gi|46981258, gi|20143564, gi|115445387, gi|115448091, gi|115448701, gi|115450493, gi|115458768, gi|115466224, gi|115477483, gi|115482032, gi|115488160, gi|125552851, gi|224612718, gi|297599961, gi|297720471, gi|354618517
3	GO: 0016265	death	gi|115445387, gi|115448091, gi|115448701
3	GO: 0044700	single organism signaling	gi|115445387, gi|115448091, gi|115448701
4	GO: 0006091	generation of precursor metabolites and energy	gi|46981258, gi|115445387, gi|115448091, gi|115448701, gi|115450493, gi|115470052, gi|125552851, gi|297599961, gi|297728925
6	GO: 0048367	shoot system development	gi|15233779, gi|46981258, gi|115488160
4	GO: 0019748	secondary metabolic process	gi|46981258, gi|115445387, gi|115448701
8	GO: 0009908	flower development	gi|15233779, gi|46981258, gi|115488160
2	GO: 0044699	single-organism process	gi|115470052, gi|15233779, gi|46981258, gi|115488160, gi|115445387, gi|115448091, gi|115448701, gi|297728925
4	GO: 0005975	carbohydrate metabolic process	gi|46981258, gi|115448091, gi|115448701, gi|115450493, gi|115458768, gi|115466224, gi|115482032, gi|125552851, gi|224612718, gi|297720471, gi|354618517
5	GO: 0019725	cellular homeostasis	gi|46981258, gi|297728925
2	GO: 0000003	reproduction	gi|15233779, gi|46981258, gi|115488160
4	GO: 0043170	macromolecule metabolic process	gi|125588601, gi|15233779, gi|115450493, gi|115470052, gi|115488160, gi|115445387, gi|115448091
7	GO: 0006464	cellular protein modification process	gi|115445387, gi|115448091
4	GO: 0042592	homeostatic process	gi|46981258, gi|297728925
4	GO: 0034641	cellular nitrogen compound metabolic process	gi|46981258, gi|20143564, gi|115445387, gi|115448091, gi|115448701, gi|115450493
2	GO: 0023052	signaling	gi|115445387, gi|115448091, gi|115448701
3	GO: 0044767	single-organism developmental process	gi|15233779, gi|46981258, gi|115488160
5	GO: 0019538	protein metabolic process	gi|125588601, gi|15233779, gi|115450493, gi|115470052, gi|115488160, gi|115445387, gi|115448091
4	GO: 1901360	organic cyclic compound metabolic process	gi|46981258, gi|20143564, gi|115445387, gi|115448091, gi|115448701, gi|115450493
2	GO: 0032501	multicellular organismal process	gi|15233779, gi|46981258, gi|115488160, gi|115448091
5	GO: 0009059	macromolecule biosynthetic process	gi|125588601
5	GO: 0009791	post-embryonic development	gi|15233779, gi|46981258, gi|115488160, gi|115448091
2	GO: 0065007	biological regulation	gi|115445387, gi|115448091, gi|115448701, gi|46981258, gi|297728925
5	GO: 0006139	nucleobase-containing compound metabolic process	gi|46981258, gi|20143564, gi|115445387, gi|115448091, gi|115448701, gi|115450493
3	GO: 0006807	nitrogen compound metabolic process	gi|46981258, gi|20143564, gi|115445387, gi|115448091, gi|115448701, gi|115450493
3	GO: 0051234	establishment of localization	gi|15233779, gi|46981258, gi|20143564, gi|115445387, gi|115448091, gi|115448701, gi|115450493, gi|297599961
4	GO: 0050794	regulation of cellular process	gi|115445387, gi|115448091, gi|115448701
5	GO: 0007165	signal transduction	gi|115445387, gi|115448091, gi|115448701
7	GO: 0048608	reproductive structure development	gi|15233779, gi|46981258, gi|115488160
2	GO: 0008152	metabolic process	gi|46981258, gi|115445387, gi|115448091, gi|115448701, gi|115450493, gi|115458768, gi|115466224, gi|115470052, gi|125552851, gi|224612718, gi|297720471, gi|354618517, gi|15233779, gi|115446663, gi|125578088, gi|125582491, gi|297599961, gi|297728925, gi|125588601, gi|115482032, gi|115488160, gi|20143564, gi|115477483
4	GO: 0006725	cellular aromatic compound metabolic process	gi|46981258, gi|20143564, gi|115445387, gi|115448091, gi|115448701, gi|115450493
4	GO: 0009653	anatomical structure morphogenesis	gi|115448091
4	GO: 0015979	photosynthesis	gi|46981258, gi|115445387, gi|115448091, gi|115448701, gi|115450493, gi|115458768, gi|115466224, gi|115470052, gi|125552851, gi|224612718, gi|297720471, gi|354618517
4	GO: 0007275	multicellular organismal development	gi|15233779, gi|46981258, gi|115488160, gi|115448091
4	GO: 0007154	cell communication	gi|115445387, gi|115448091, gi|115448701
4	GO: 0003006	developmental process involved in reproduction	gi|15233779, gi|46981258, gi|115488160
3	GO: 0022414	reproductive process	gi|15233779, gi|46981258, gi|115488160
5	GO: 0010467	gene expression	gi|125588601
3	GO: 0016043	cellular component organization	gi|15233779, gi|46981258, gi|115445387, gi|115448091, gi|115448701, gi|115450493, gi|115488160, gi|125588601, gi|297728925
5	GO: 0043412	macromolecule modification	gi|115445387, gi|115448091
3	GO: 0044237	cellular metabolic process	gi|46981258, gi|115445387, gi|115448091, gi|115448701, gi|115450493, gi|115458768, gi|115466224, gi|115470052, gi|125552851, gi|224612718, gi|297720471, gi|354618517, gi|297599961, gi|297728925, gi|125588601, gi|20143564
4	GO: 0051716	cellular response to stimulus	gi|115445387, gi|115448091, gi|115448701
2	GO: 0032502	developmental process	gi|15233779, gi|46981258, gi|115488160, gi|115448091
3	GO: 0006950	response to stress	gi|15233779, gi|46981258, gi|20143564, gi|115445387, gi|115446663, gi|115448091, gi|115448701, gi|115450493, gi|115466224, gi|125552851, gi|125578088, gi|125582491, gi|149392545, gi|297728925, gi|305691143
3	GO: 0009607	response to biotic stimulus	gi|46981258, gi|20143564, gi|115445387, gi|115448091, gi|115448701, gi|115450493
3	GO: 0044707	single-multicellular organism process	gi|15233779, gi|46981258, gi|115488160, gi|115448091
3	GO: 0009605	response to external stimulus	gi|46981258, gi|20143564, gi|115445387, gi|115448091, gi|115448701, gi|115450493
5	GO: 0009790	embryo development	gi|115488160
6	GO: 0036211	protein modification process	gi|115445387, gi|115448091

## Sheet: Table S2
Table S2. Primers used for qRT-PCR assays.
Gene	Foward Primer (5'–3')	Reverse Primer (5'–3')
Os03g62630	TGTCGCCCTTTCTGTTGATAA	CGTGTAGGAGTACCAGGTAAGA
Os05g41640	CAGTAGGAACTGAGGCTA	TAACATCTGCAACTCCC
Os02g34810	AGGGATTTTCACTGGACGATG	GACGAAGGGCTCTGGTTGC
Os03g03720	ATGGCCACACACGCAGC	TCTCCGGTAGCCCTGGC
Os06g51029	GGAGCTACCTAGAGAACCAAATG	CAACACGTGAAACCTGCATAAA
Os04g38600	GCTGAAGGTGGCGATCAA	GGAGTCGTACTTGAGGAGGT
Os06g04270	GGCTGACGCTCTTCCTAAAT	CTCCAAGAAGACCAGGAACAA
OSJNBa0034L04.44	TCCTCCGTAGCTCAAGTAGTAA	CCGTATAAGGAGCGAGGTATTG
Os06g51029	GAAGAGGAGACTTGTGGCTTAC	GCTTGACCACGAGGAATGAT
Os01g45274	TCCTCCAACAGCAGCAACC	TCTTGAACTTGGCGAACCC
Os09g39180	CTGTATCCTCCCAAGTCCTTTC	CAGTAGCCTACGTGCATCAA
Os02g47020	TCCTCTCTCCTCCTTATGTTCTC	CTGCTGGAGTTGCTCTTCTT
Os02g15750	GGACCGAAAGAGAACCCTTAAA	GAGCCTGACCGATTTCCTTTAT
Os12g14070	AAGATCGAGGAGGTCG	CAAGGGTATCATCATAAGTC
OsActin	TGTATGCCAGTGGTCGTACCA	CCAGCAAGGTCGAGACGAA
